# Supplementary material
Source: publisher site journal article supplement (https://www.dovepress.com/get_supplementary_file.php?f=257522.docx)

Supplementary Figure S1

Immunohistochemical staining for Caspase-3 in DU145 and PC3 cancer tissues.





Supplementary Figure S2

IHC staining of control in mice liver section.


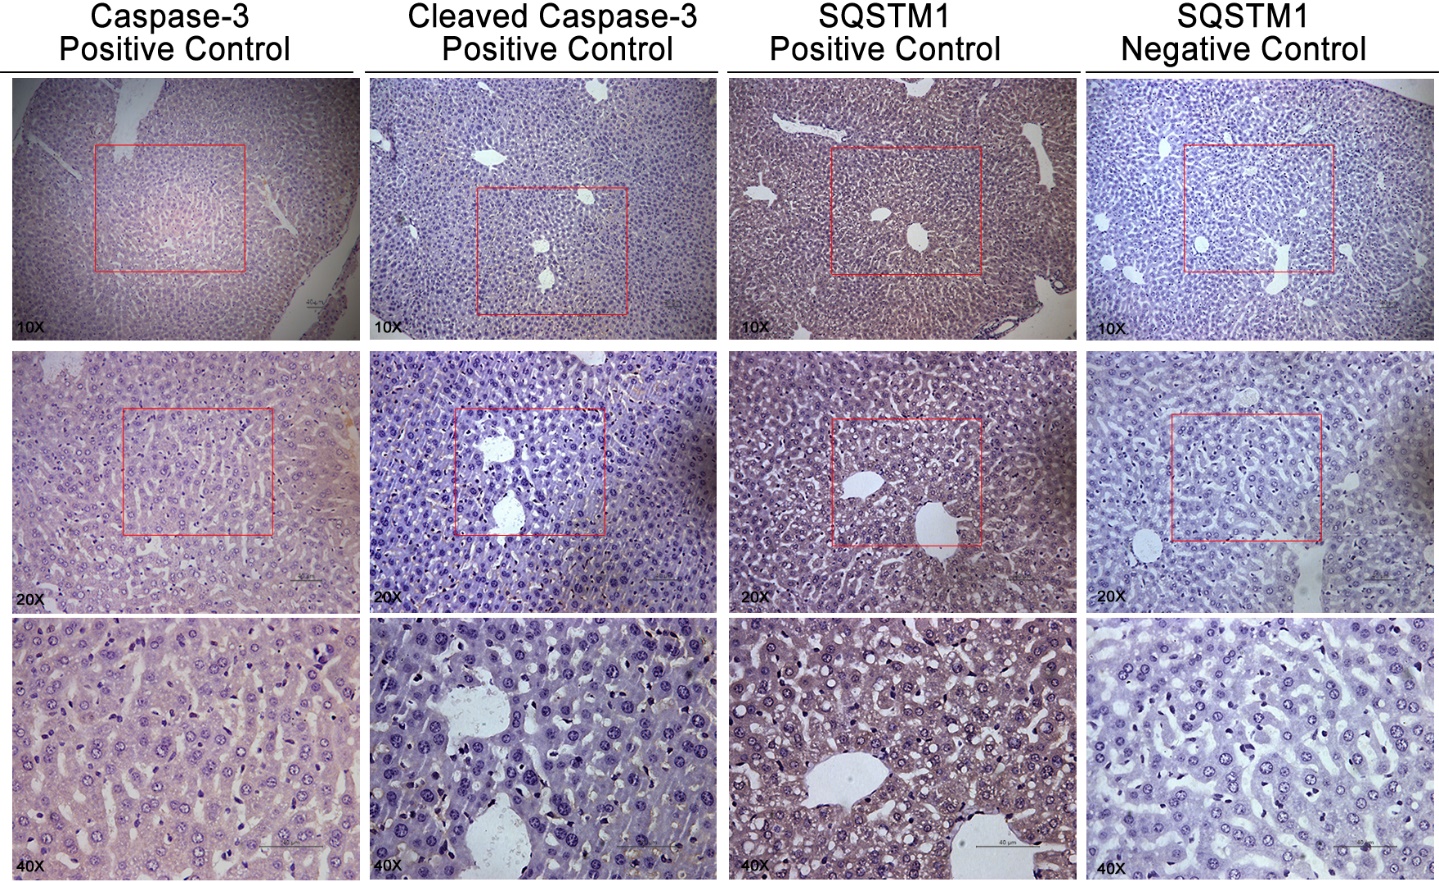

Supplement: Supplementary file 1 [file get_supplementary_file.php]
